# Supplementary material
Source: publisher site journal article supplement (https://www.dovepress.com/get_supplementary_file.php?f=487849.docx)
Supplement: Supplementary file 1 [file get_supplementary_file.php]

**Supplemental Table 1**. Physician ratings of the leadership qualities of immediate supervisor

|  | **Strongly Agree %** | **Agree %** | **Neither Agree nor Disagree %** | **Disagree %** | **Strongly Disagree %** |
| --- | --- | --- | --- | --- | --- |
| Holds career development conversations with mea | 29.86 | 37.46 | 13.24 | 10.42 | 9.01 |
| Inspires me to do my besta | 28.33 | 34.44 | 19.17 | 10 | 8.06 |
| Empowers me to do my joba | 28.06 | 37.78 | 16.67 | 9.72 | 7.78 |
| Is interested in my opiniona | 39.17 | 31.67 | 11.67 | 10.83 | 6.67 |
| Encourages employees to suggest ideas for improvementa | 32.12 | 41.62 | 13.69 | 6.7 | 5.87 |
| Treats me with respect and dignitya | 51.1 | 29.01 | 9.12 | 6.08 | 4.7 |
| Provides helpful feedback and coaching on my performancea | 24.64 | 29.51 | 25.5 | 12.89 | 7.45 |
| Recognizes me for a job well donea | 37.92 | 32.3 | 13.48 | 8.99 | 7.3 |
| Keeps me informed about changes taking place at [Institution Name]a | 37.99 | 43.02 | 12.85 | 4.19 | 1.96 |
| Encourages me to develop my talents and skillsa | 30.7 | 34.08 | 20 | 7.89 | 7.32 |
| I would recommend working for my immediate supervisora | 38.16 | 30.64 | 14.48 | 8.08 | 8.64 |
|  | **Very Satisfied %** | **Satisfied %** | **Neither Satisfied nor Dissatisfied %** | **Dissatisfied %** | **Very Dissatisfied %** |
| Overall, how satisfied are you with your immediate supervisorb | 36.39 | 32.78 | 13.89 | 10.56 | 6.39 |
| a response options: 5 =strongly agree, 4=agree, 3=neither agree nor disagree, 2=disagree, 1=strongly disagree; NA=don’t know/not applicable  b response options: 5=very satisfied, 4=satisfied, 3=neither satisfied nor dissatisfied, 2=dissatisfied, 1=very dissatisfied | | | | | |

|  | **Burnout** | | | **Satisfaction** | | |
| --- | --- | --- | --- | --- | --- | --- |
|  | **Mean Rating those Burned Outa  (std dev)** | **Mean Rating Those Not Burned Outa  (std dev)** | ***P value**** | **Mean Rating those Satisfieda (std dev)** | **Mean Rating Those Not Satisfieda (std dev)** | ***P value**** |
| Holds career development conversations with me | 3.52 (1.30) | 3.81 (1.21) | 0.0342* | 4.09 (1.04) | 3.41 (1.32) | <.0001* |
| Inspires me to do my best | 3.46 (1.26) | 3.80 (1.16) | 0.0087* | 4.08 (1.00) | 3.38 (1.25) | <.0001* |
| Empowers me to do my job | 3.42 (1.30) | 3.89 (1.07) | 0.0002* | 4.17 (0.91) | 3.37 (1.25) | <.0001* |
| Is interested in my opinion | 3.64 (1.31) | 4.03 (1.14) | 0.0025* | 4.29 (0.95) | 3.59 (1.32) | <.0001* |
| Encourages employees to suggest ideas for improvement | 3.71 (1.11) | 4.00 (1.10) | 0.0150* | 4.19 (0.94) | 3.67 (1.18) | <.0001* |
| Treats me with respect and dignity | 4.00 (1.21) | 4.29 (1.02) | 0.0193* | 4.47 (0.88) | 3.97 (1.20) | <.0001* |
| Provides helpful feedback and coaching on my performance | 3.34 (1.23) | 3.64 (1.17) | 0.0254* | 3.93 (1.06) | 3.24 (1.21) | <.0001* |
| Recognizes me for a job well done | 3.58 (1.33) | 4.05 (1.10) | 0.0006* | 4.37 (0.87) | 3.51 (1.30) | <.0001* |
| Keeps me informed about changes taking place at [Institution Name] | 3.92 (0.97) | 4.25 (0.86) | 0.0007* | 4.40 (0.77) | 3.91 (0.96) | <.0001* |
| Encourages me to develop my talents and skills | 3.53 (1.23) | 3.88 (1.13) | 0.0066* | 4.18 (0.91) | 3.42 (1.26) | <.0001* |
| I would recommend working for my immediate supervisor | 3.56 (1.35) | 4.02 (1.14) | 0.0008* | 4.31 (1.00) | 3.50 (1.31) | <.0001* |
| Overall, how satisfied are you with your immediate supervisor | 3.53 (1.34) | 4.04 (1.06) | 0.0001* | 4.34 (0.89) | 3.48 (1.28) | <.0001* |
| a Mean rating on 5 point Likert scale (high values more favorable)  * Denotes statistical significance (*p* < 0.05) | | | | | | |

**Supplemental Table 2**. Mean ratings of leadership qualities of immediate supervisor by burnout and satisfaction
